# Supplementary material
Source: PubMed Central journal article supplement (PMC6802420)
Supplement: jamainternmed-180-181-s003.pdf [file jamainternmed-180-181-s003.pdf]

## Data Sharing Statement

Romskaug. Effect of Clinical Geriatric Assessments and Collaborative Medication Reviews by Geriatrician and Family Physician for Improving Health-Related Quality of Life in Home-Dwelling Older Patients Receiving Polypharmacy. *JAMA Intern Med*. Published October 16, 2019. 10.1001/jamainternmed.2019.5096

### Data

**Data available:** No

### Additional Information

**Explanation for why data not available:** This is not allowed by the Data Protection Official at Oslo University Hospital.
